# Supplementary material for: Molybdenum disulfide and Au ultrasmall nanohybrids as highly active electrocatalysts for hydrogen evolution reaction
Source: Royal Society of Chemistry journal article supplement (doi:10.1039/c6ta10385e), 2017-01-01
Supplement: c6ta10385e1.pdf [file c6ta10385e1.pdf]

SUPPLEMENTARY INFORMATION FOR

**Molybdenum Disulfide and Au Ultrasmall Nanohybrids as Highly Active Electrocatalysts  
for Hydrogen Evolution Reaction**

Jinxuan Zhang, Tanyuan Wang, Lu Liu, Kuangzhou Du, Wanglian Liu, Zhiwei Zhu, and Meixian Li\*

College of Chemistry and Molecular Engineering, Peking University, Beijing 100871, P.R.China

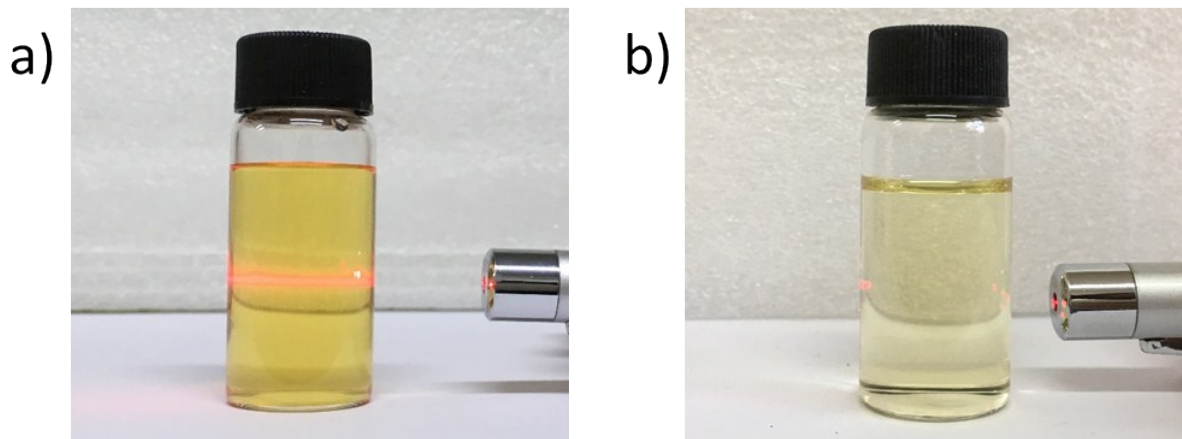

Fig. S1 Optical graphs of (a) MoS<sub>2</sub>-Au nanohybrids aqueous solution and (b) AuNCs solution.

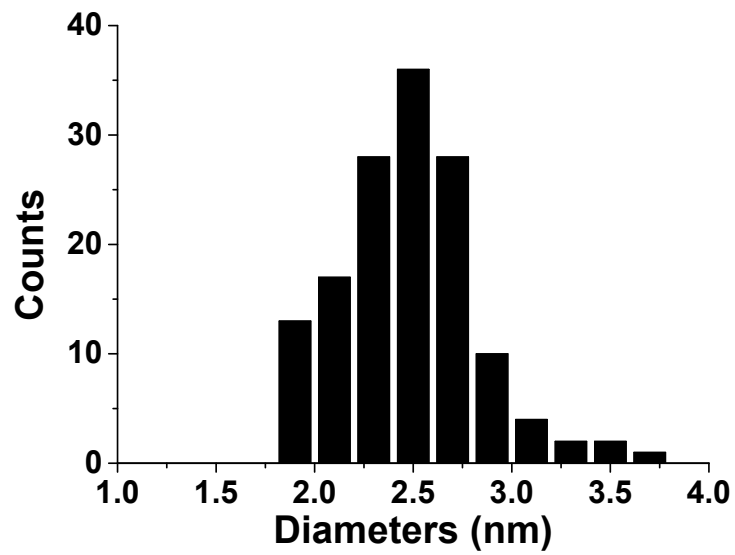

Fig. S2 Size distribution of MoS<sub>2</sub>-Au nanohybrids measured by analyzing 141 nanoparticles from TEM image.

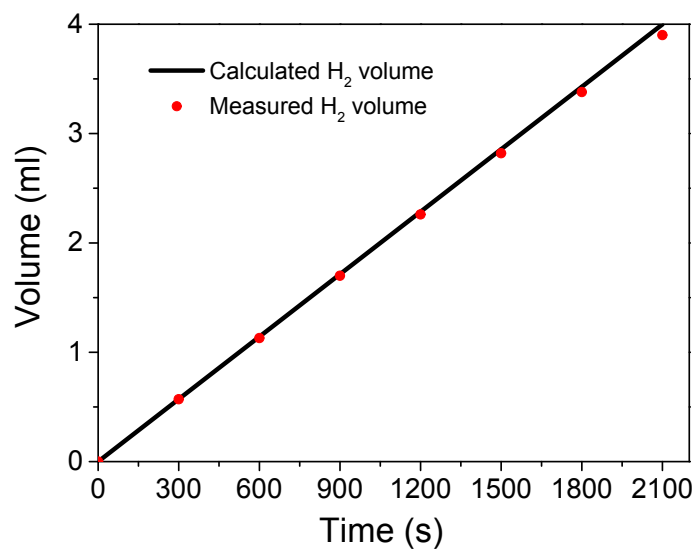

**Fig. S3** The experimental and theoretical volumes of H<sub>2</sub> that evolved from the working electrode.

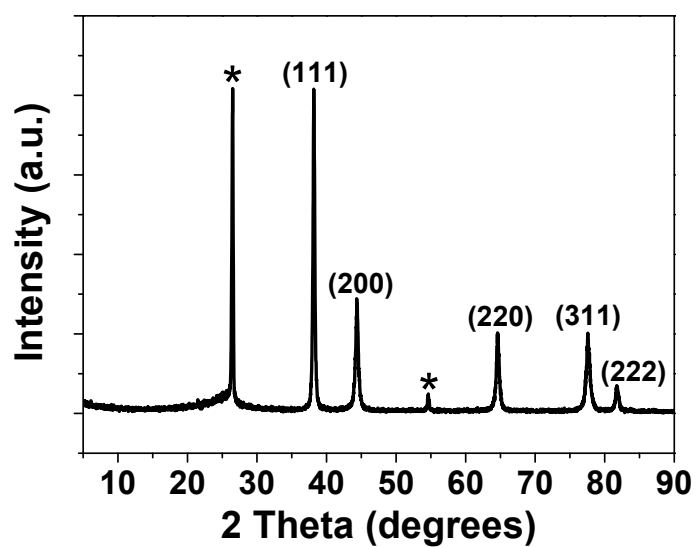

**Fig. S4** XRD pattern of the AuNCs films on carbon fibre paper. (The symbols \* represent the XRD patterns of carbon fibre paper)

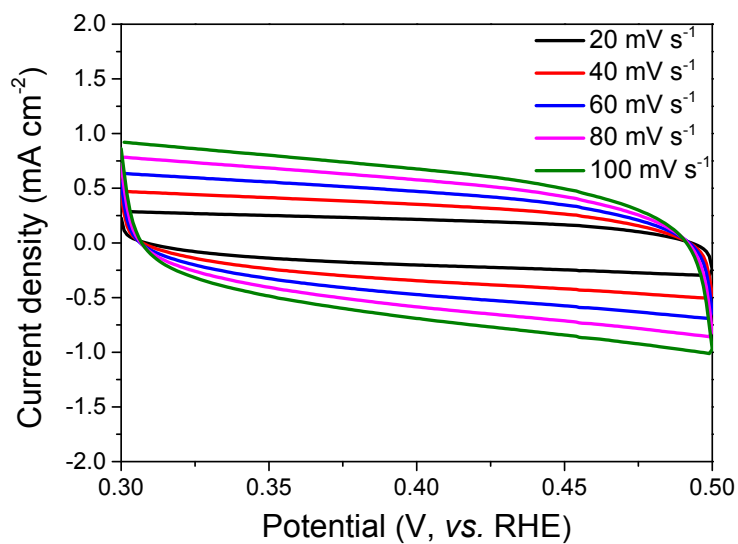

**Fig. S5** Cyclic voltammograms of blank carbon fibre paper at various scan rates in 0.5 M H<sub>2</sub>SO<sub>4</sub>.

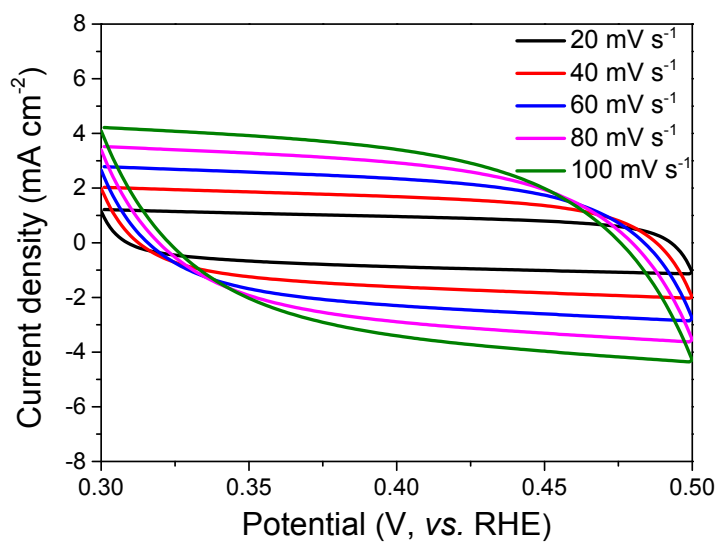

**Fig. S6** Cyclic voltammograms of MoS<sub>2</sub>-Au nanohybrids modified carbon fibre paper at various scan rates in 0.5 M H<sub>2</sub>SO<sub>4</sub>.

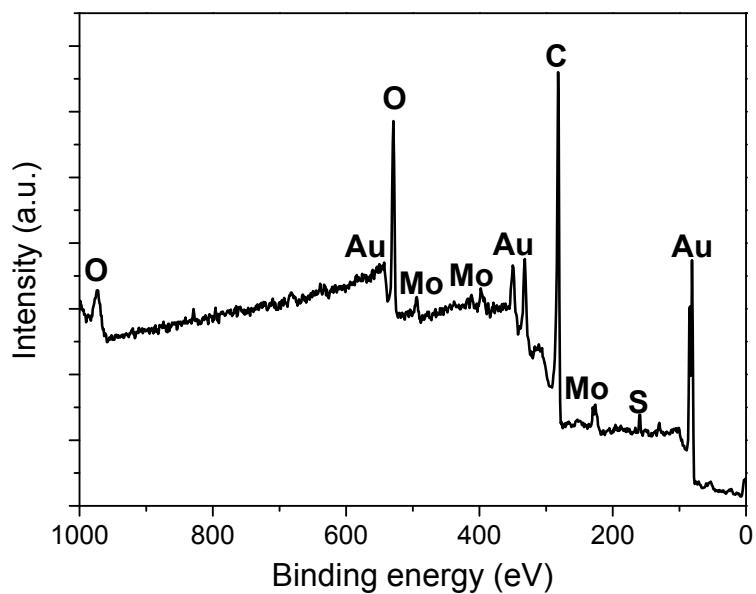

Fig. S7 XPS survey spectrum of MoS<sub>2</sub>-Au nanohybrids.

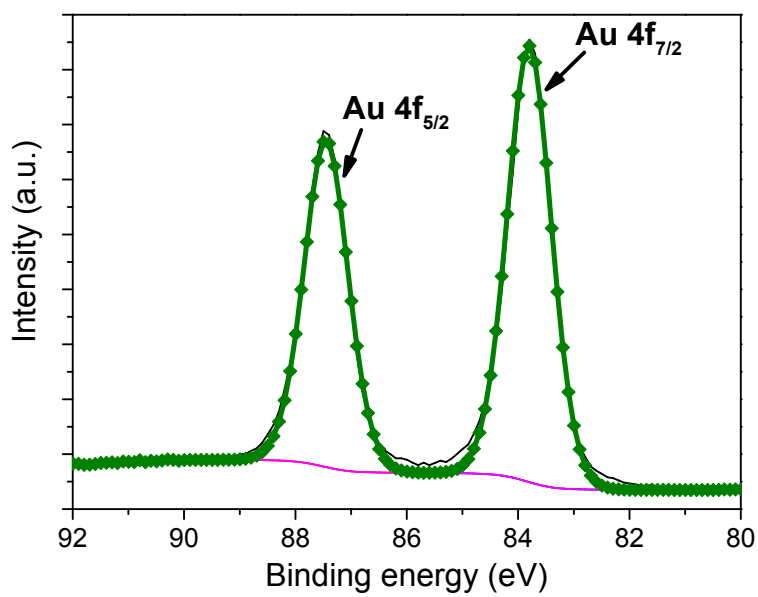

Fig. S8 XPS spectrum of Au 4f region for AuNCs

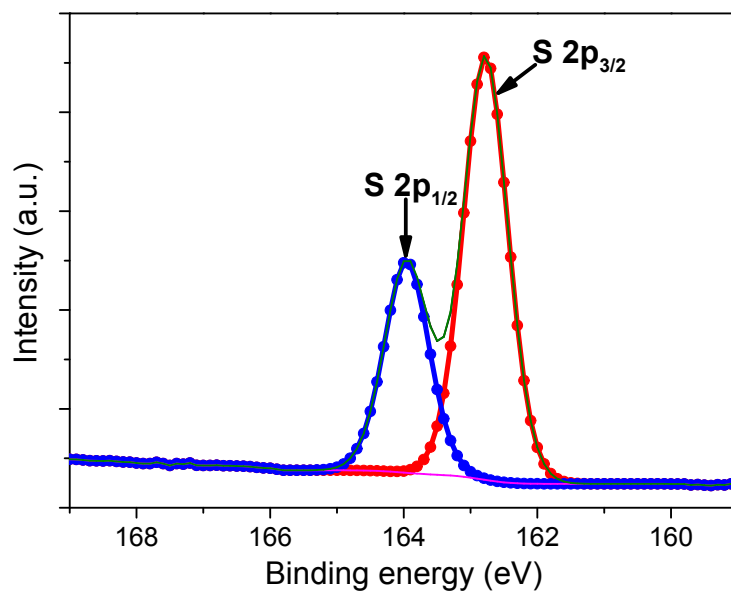

**Fig. S9** XPS spectrum of S 2p region for MoS<sub>2</sub> nanoparticles.

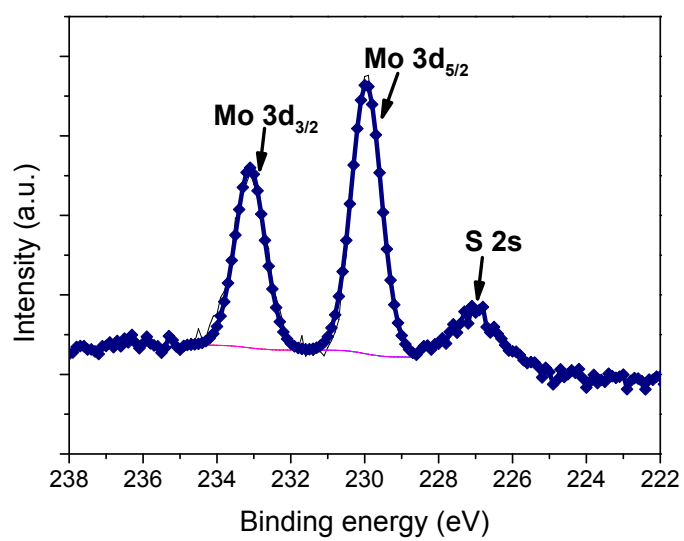

**Fig. S10** XPS spectrum of Mo 3d region for MoS<sub>2</sub>-Au nanohybrids.

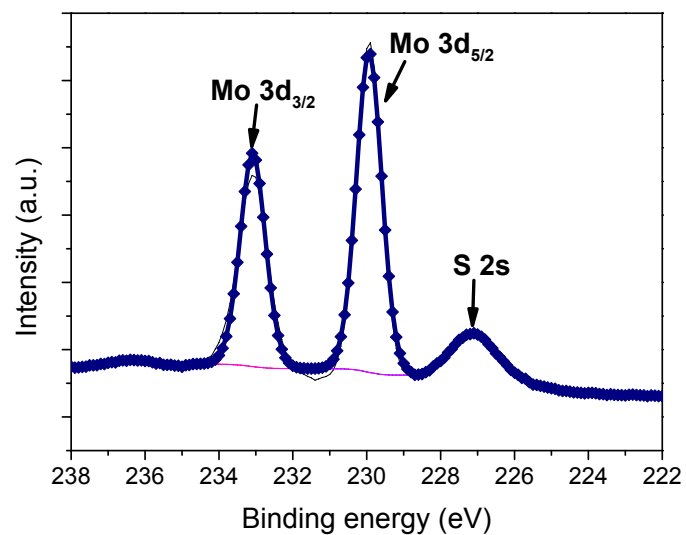

**Fig. S11** XPS spectrum of Mo 3d region for MoS<sub>2</sub> nanoparticles.

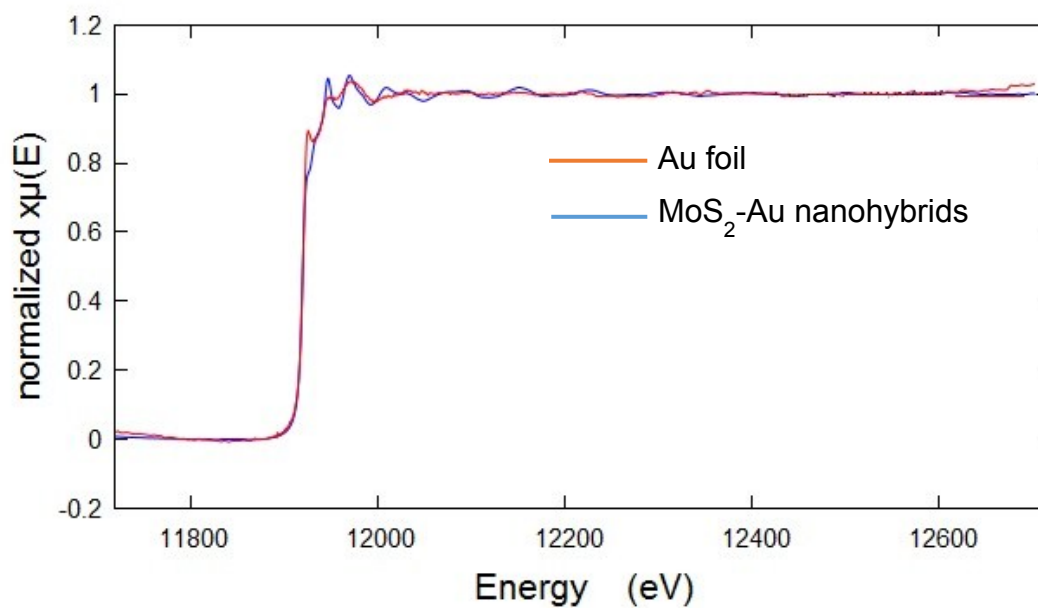

**Fig. S12** Normalized Au L3 edge XANES spectra of MoS<sub>2</sub>-Au nanohybrids and Au foil.

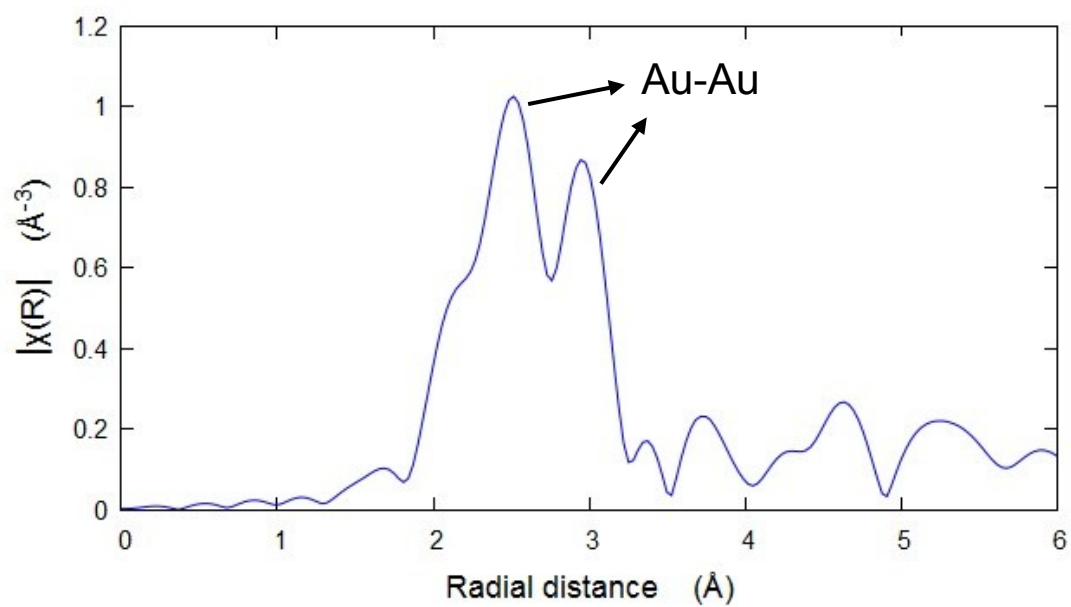

Fig. S13 FT-EXAFS of Au foil in R space.

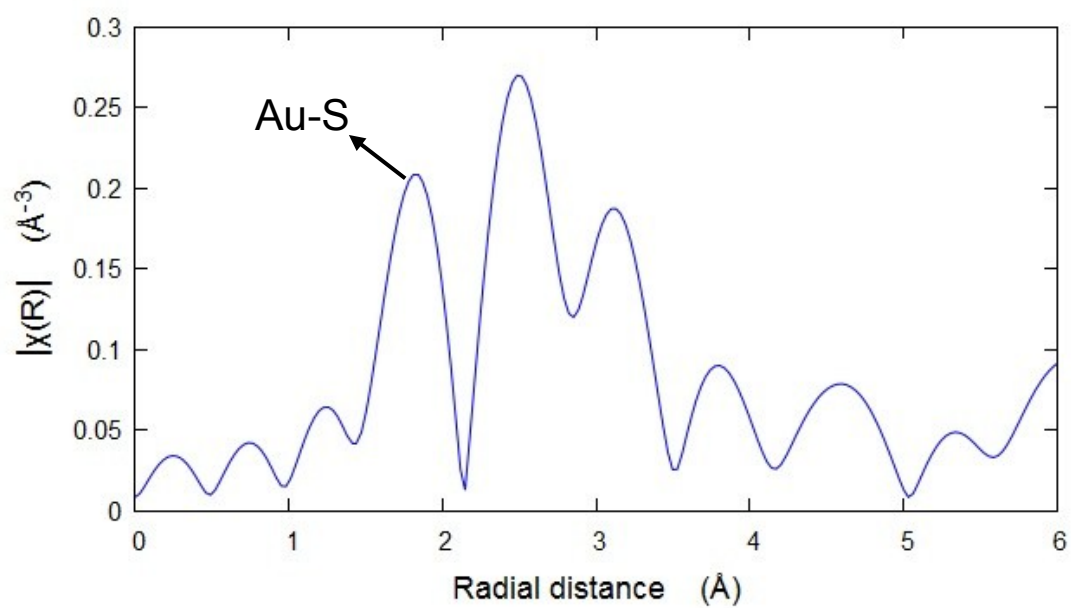

Fig. S14 FT-EXAFS of  $\text{MoS}_2$ -Au nanohybrids in R space.



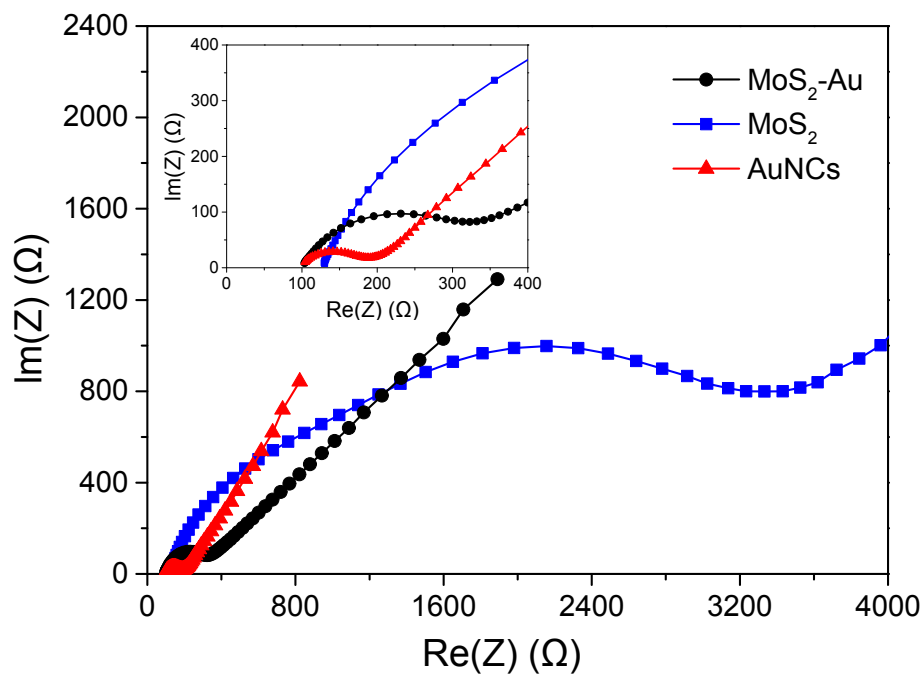

**Fig. S15** Electrochemical impedance spectra of MoS<sub>2</sub>-Au nanohybrids, MoS<sub>2</sub> nanoparticles and AuNCs modified electrode in 0.1 M KCl–0.01 M phosphate buffer solution (pH = 7.4) containing 2.5 mM K<sub>3</sub>Fe(CN)<sub>6</sub> and 2.5 mM K<sub>4</sub>Fe(CN)<sub>6</sub>.

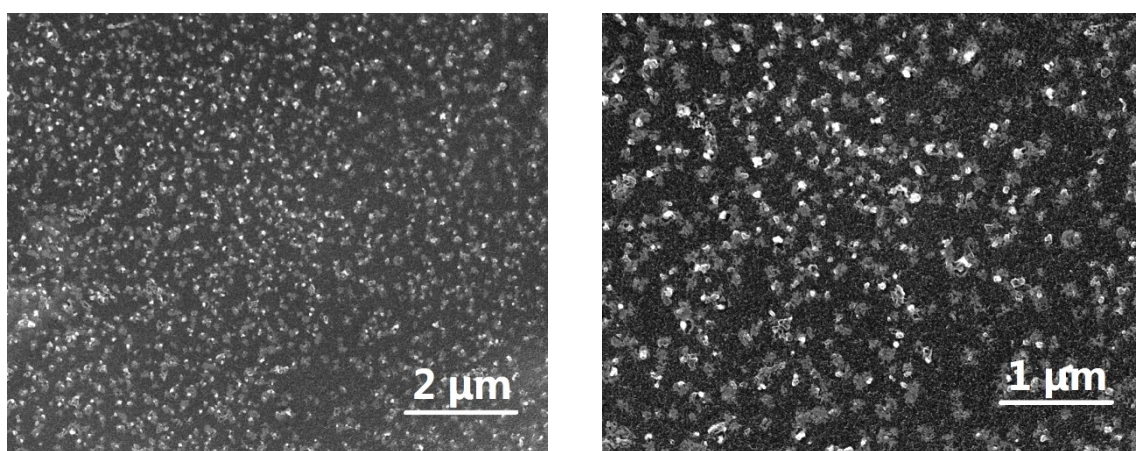

**Fig. S16** SEM images of carbon fibre paper modified with MoS<sub>2</sub>-Au nanohybrids after electrolysis for 12 h at -0.070 V vs. RHE.
